# Supplementary material
Source: publisher figshare collection journal article supplement (https://acs.figshare.com/ndownloader/files/3741061)
Supplement: Supplementary file 1 [file 3741061]

## SUPPORTING INFORMATION

### Electrochemical single-molecule transistors with optimized gate coupling

Henry M. Osorio, Samantha Catarelli, Pilar Cea, Josef B. G. Gluyas, František Hartl, Simon J. Higgins, Edmund Leary, Paul J. Low, Santiago Martín, Richard J. Nichols, Joanne Tory, Jens Ulstrup, Andrea Vezzoli, David C. Milan and Qiang Zeng.

### **1.0 General Synthetic Methods for Synthesis of 2 in Main Paper**

All reactions were carried out under an atmosphere of dry nitrogen using standard Schlenk techniques. Dichloromethane was purified and dried using an Innovative Technology SPS-400 before use, triethylamine was distilled over calcium sulfate, other solvents were standard reagent grade and used as received. No special precautions were taken to exclude air or moisture during workup except where otherwise indicated. The catalyst  $\text{PdCl}_2(\text{PPh}_3)_2$  was synthesized by literature methods.<sup>1</sup> All other reagents were commercially available and used as received. NMR spectra were recorded at 23 °C on a Varian NMR Systems 700 ( $^1\text{H}$ , 699.7 MHz;  $^{11}\text{B}$ , 224.5 MHz;  $^{13}\text{C}$ , 175.9 MHz;  $^{29}\text{Si}$ , 139.0 MHz) or a Varian NMR Systems 600 spectrometer ( $^{19}\text{F}$ , 564.3 MHz) using  $\text{CDCl}_3$  or  $\text{CD}_3\text{CN}/\text{D}_2\text{O}$  (2:1 (v/v)) as the solvent. Chemical shifts were determined relative to internal  $\text{CHCl}_3$  ( $^1\text{H}$   $\delta$  = 7.26 ppm,  $\text{CDCl}_3$ ), internal  $\text{CDCl}_3$  ( $^{13}\text{C}$   $\delta$  = 77.16 ppm,  $\text{CDCl}_3$ ), internal  $\text{CHD}_2\text{CN}$  ( $^1\text{H}$   $\delta$  = 1.94 ppm,  $\text{CD}_3\text{CN}/\text{D}_2\text{O}$  (2:1 (v/v))), internal  $\text{CD}_3\text{CN}$  ( $^{13}\text{C}$   $\delta$  = 1.32 ppm,  $\text{CD}_3\text{CN}/\text{D}_2\text{O}$  (2:1 (v/v)))<sup>2</sup> external  $\text{BF}_3\cdot\text{Et}_2\text{O}$  ( $^{11}\text{B}$   $\delta$  = 0.0), external  $\text{CF}_3\text{C}_6\text{H}_5$  ( $^{19}\text{F}$   $\delta$  = -63.72 ppm) and external tetramethylsilane ( $^{29}\text{Si}$   $\delta$  = 0.0 ppm). Assignment of the  $^1\text{H}$  and  $^{13}\text{C}$  NMR data was supported by gradient selected  $^{13}\text{C}, ^1\text{H}$  HMQC and HMBC experiments. EI-MS spectra were recorded on a Thermo-Finnigan Corporation Trace GC-MS and ESI-MS were recorded on a Waters Ltd TQD mass spectrometer in positive mode. Elemental analyses were performed at the London Metropolitan University.

### **2.0 Viologen ( $1^{2+}$ ) Synthesis**

In brief reaction of 1,6–dibromohexane with KSAc gave *S*-(6-bromohexyl)ethanethioate (**5**) which, on reaction with 4,4'-bipyridine (**6**), gave the viologen as its bromide salt; metathesis with  $\text{NH}_4[\text{PF}_6]$  in water then afforded  $3[\text{PF}_6]_2$ . These represent minor modifications of literature routes described in references<sup>3,4</sup>

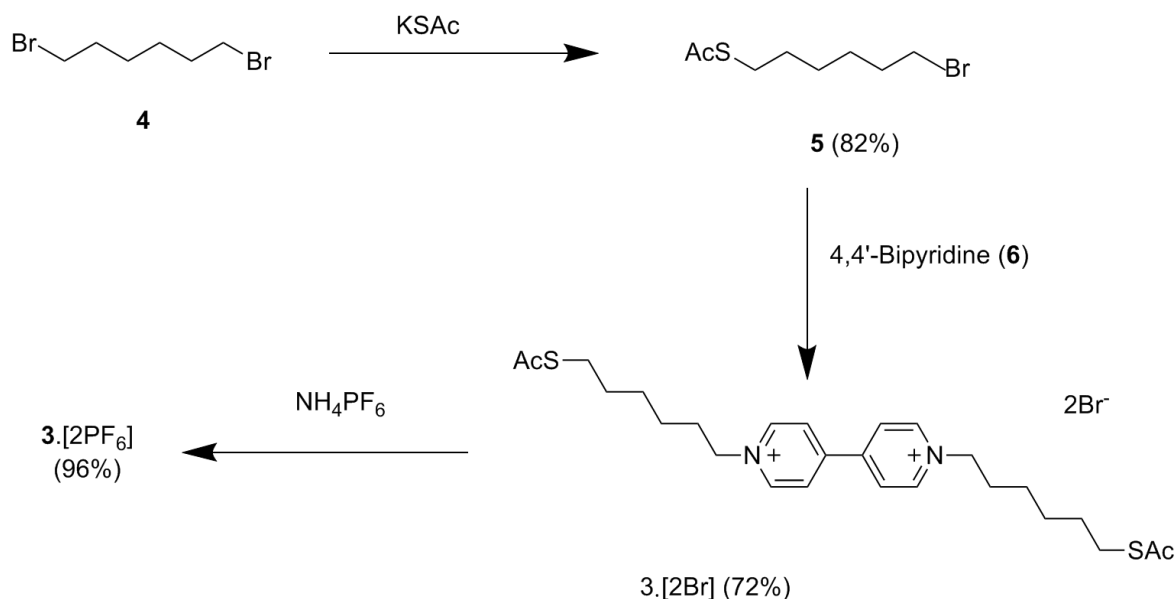

Scheme 1. Synthesis of the precursor to **1**; yields are given in parentheses.

***N,N'*-Di-(6-(thioacetyl)hexyl)-4,4'-bipyridinium bis(hexafluorophosphate) (3•[PF<sub>6</sub>]<sub>2</sub>)**

A solution of **3•[Br]<sub>2</sub>** (0.228 g, 0.36 mmol) in water (20 mL) was treated with an excess of ammonium hexafluorophosphate (0.585 g, 3.6 mmol, 10 eq.). A white precipitate immediately appeared. The resulting suspension was filtered, the residue washed with water (3 x 10 mL) and dried overnight *in vacuo* to afford **3•[PF<sub>6</sub>]<sub>2</sub>** as white powder in 96% yield. (0.236 g, 0.31 mmol). <sup>1</sup>H NMR (400 MHz, Acetone-d<sub>6</sub>): 9.46 (d, *J* = 8.8 Hz, 4H, V), 8.85 (d, *J* = 5.8 Hz, 4H, V), 4.97 (t, *J* = 7.6 Hz, 4H, CH<sub>2</sub>), 2.84 (t, *J* = 7.4 Hz, 4H, CH<sub>2</sub>), 2.29 (s, 6H, CH<sub>3</sub>), 2.21 (m, 4H, CH<sub>2</sub>), 1.61 – 1.42 (m, 12H, CH<sub>2</sub>) ppm. <sup>13</sup>C NMR (100 MHz, Methanol-d<sub>4</sub>): 195.0, 150.4, 145.9, 127.2, 62.4, 31.1, 29.4, 29.2, 29.0, 27.8, 25.3 ppm. *m/z* (HRMS, ES<sup>+</sup>, CH<sub>3</sub>OH, 60 V) 787.1547 [M + Na]<sup>+</sup>, C<sub>26</sub>H<sub>38</sub>F<sub>12</sub>N<sub>2</sub>NaO<sub>2</sub>P<sub>2</sub>S<sub>2</sub> calc. 787.1556. HRMS spectra showed peaks of comparable intensity at 619.20 [M - PF<sub>6</sub>]<sup>+</sup> and 473.19 [M - 2PF<sub>6</sub>]<sup>2+</sup>.

***N,N'*-Di-(6-(thioacetyl)hexyl)-4,4'-bipyridinium dibromide (3•[Br]<sub>2</sub>).**

A solution of **5** (1.53 g, 6.4 mmol) and 4,4'-bipyridine (0.25 g, 1.6 mmol) in acetonitrile (15 mL) was heated to reflux for 36h, whereupon it became orange with the presence of abundant yellow precipitate. The mixture was then allowed to cool to room temperature, sonicated, filtered and the precipitate was washed with cold EtOH (20 mL) and diethyl ether (20 mL). The crude product was purified by recrystallization from boiling EtOH, and dried overnight *in vacuo* to afford **3•[Br]<sub>2</sub>** in 72% yield as yellow powder (0.73 g, 1.2 mmol). <sup>1</sup>H NMR (400 MHz, Methanol-d<sub>4</sub>): 9.29 (d, *J* = 8.8 Hz, 4H, V), 8.69 (d, *J* = 5.8 Hz, 4H, V), 4.76 (t, *J* = 7.4 Hz, 4H, CH<sub>2</sub>), 2.87 (t, *J* = 7.2 Hz, 4H, CH<sub>2</sub>), 2.29 (s, 6H, CH<sub>3</sub>), 2.11 (m, 4H, CH<sub>2</sub>), 1.61 (m, 4H, CH<sub>2</sub>), 1.47 (m, 8H, CH<sub>2</sub>) ppm. <sup>13</sup>C NMR (100 MHz, Methanol-d<sub>4</sub>): 196.4, 149.9,

145.4, 126.9, 61.9, 30.9, 29.1, 29.0, 28.1, 27.6, 25.2 ppm.  $m/z$  (HRMS, ES+, CH<sub>3</sub>OH, 60 V) 474.2372 [ $M - 2Br$ ]<sup>2+</sup>, C<sub>26</sub>H<sub>38</sub>N<sub>2</sub>O<sub>2</sub>S<sub>2</sub> calc. 474.2375.

### **S-(6-bromohexyl) ethanethioate (5)**

This preparation was adapted from the procedure developed by Shi *et al.*<sup>5</sup> A suspension of finely ground potassium thioacetate (2.50 g, 21.9 mmol) in THF (20 mL) was added dropwise to a solution of 1,6-dibromohexane (10.68 g, 43.8 mmol) in THF (50 mL) and stirred for 24 h at room temperature. The solvent was then removed *in vacuo*, the residue suspended in CH<sub>2</sub>Cl<sub>2</sub>, filtered and washed with water (3 x 25 mL). The organic phase was dried over MgSO<sub>4</sub> and filtered. After removing the solvent *in vacuo*, the crude product was purified by flash column chromatography on SiO<sub>2</sub> (40 % CH<sub>2</sub>Cl<sub>2</sub> in hexanes) to afford **5** in 82% yield as a light yellow oil (4.29 g, 17.9 mmol). <sup>1</sup>H NMR (400 MHz, CDCl<sub>3</sub>):  $\delta$  = 3.41 (t, J = 6.7 Hz, 2H, CH<sub>2</sub>), 2.87 (t, J = 7.2 Hz, 2H, CH<sub>2</sub>), 2.32 (s, 3H, CH<sub>3</sub>), 1.92-1.78 (m, 2H, CH<sub>2</sub>), 1.60 (m, 2H, CH<sub>2</sub>) 1.54-1.30 (m, 4H, CH<sub>2</sub>) ppm.

### **3.0 Electrochemistry of 2(BF<sub>4</sub>)<sub>2</sub> in Acetonitrile Electrolytes**

Cyclic voltammetry was carried out in using a Princeton Technologies VersaStat-3 potentiostat, with a platinum microdisc working electrode, a platinum wire counter electrode, and a platinum wire pseudo-reference electrode, from solutions in acetonitrile containing 0.1 M *n*-Bu<sub>4</sub>NPF<sub>6</sub> as the electrolyte,  $\nu$  = 100 mV s<sup>-1</sup>. Measurements with  $\nu$  = 100, 200, 400 and 800 mVs<sup>-1</sup> showed that the ratio of the anodic to cathodic peak currents varied linearly as a function of the square root of scan rate in all cases. The ferrocene/ferrocenium couple was used as an internal reference. Data manipulation was carried out using SOAS and MATLAB software packages.<sup>6,7</sup>

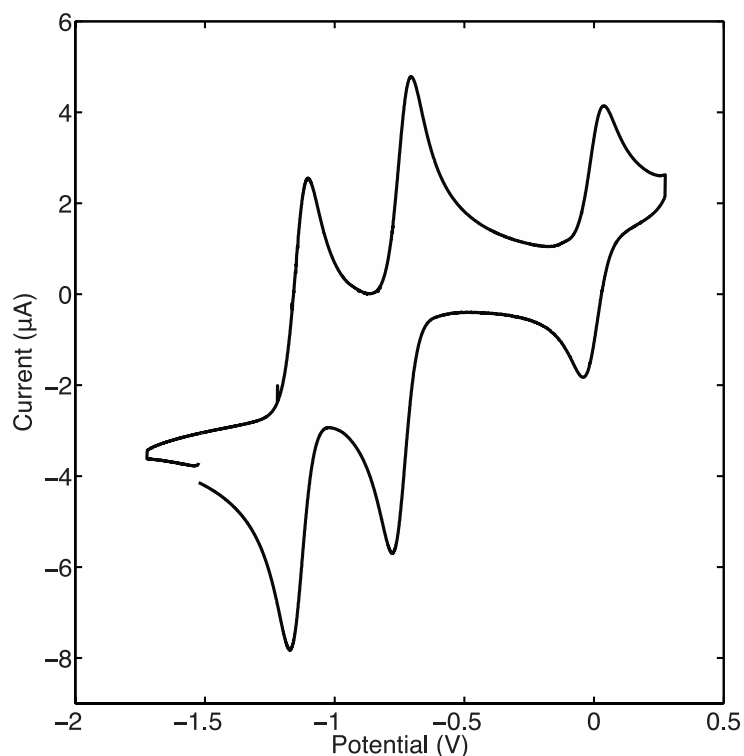

**Figure S1.** Cyclic voltammogram of  $2(\text{BF}_4)_2$  in acetonitrile / 0.1 M  $\text{NBu}_4\text{PF}_6$  containing  $\text{Fc}/\text{Fc}^+$  at 0.0 V. Wave 1:  $E_{1/2} = 1140$  mV,  $\Delta E_p = 70$  mV; Wave 2:  $E_{1/2} = 741$  mV,  $\Delta E_p = 73$  mV.

This shows good reversible electrochemistry for the reduction to the cation radical and then at more negative potentials to the neutral compound. The electrochemistry in ionic liquids (see below) essentially shows a similar pattern with some broadening in the peak separation and also some added complexity in the second cathodic wave.

#### **4.0 Electrochemistry of $2(\text{BF}_4)_2$ in Ionic Liquids**

A 7.5 mM solution of  $2(\text{BF}_4)_2$  in BMIM-OTf was prepared by dissolving the viologen in methanol, and then adding the ionic liquid. The methanol was evaporated off at  $\sim 100^\circ\text{C}$  for 1.5 hours with nitrogen bubbling directly in to the solution. The working electrode was a Au(111) bead, with a hanging meniscus, while the counter and reference electrodes were 0.5 mm Pt wire. All potentials were determined against an internal  $\text{Fc}/\text{Fc}^+$  reference added after the experiment. The CVs in ionic liquid of  $2(\text{BF}_4)_2$  were run at  $0.1 \text{ V s}^{-1}$  intervals between 0.1 and 1.0, as well as at  $0.05$  and  $0.075 \text{ V s}^{-1}$  and are shown in Figures S2.

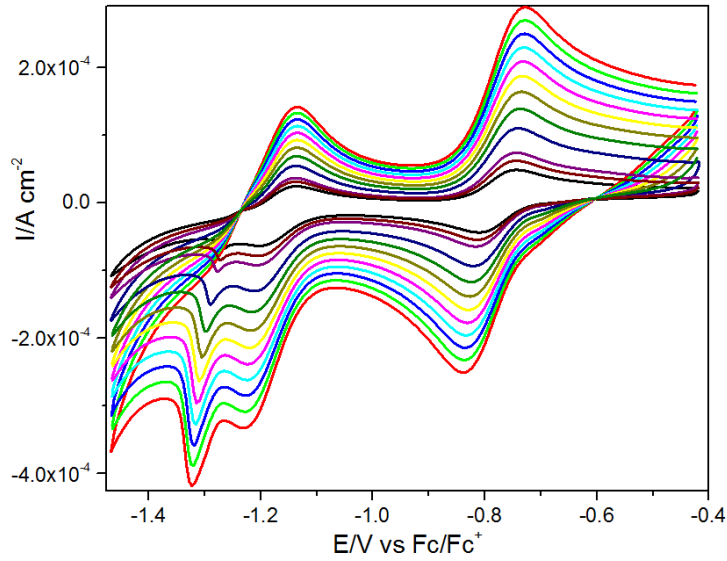

**Figure S2:** CV of  $2(\text{BF}_4)_2$  in BMIM-OTf showing the first reduction to the radical cation and the second reduction to the neutral compound. On going from the red to the black curve the sweep rate follows the order 1.0, 0.9, 0.8, 0.7, 0.6, 0.5, 0.4, 0.3, 0.2, 0.1, 0.075, and 0.05  $\text{V s}^{-1}$ .

The two expected peaks occur at -0.77 and -1.16 V vs  $\text{Fc}/\text{Fc}^+$ , while the extra peak occurs at -1.29 V vs  $\text{Fc}/\text{Fc}^+$ . The latter may, for example, arise from adsorption of the second reduction product (the neutral compound).

## 5.0 The Two Step Model Equations

To model the data we take the expression for the two-step hopping model of Kuznetsov and Ulstrup as given in reference <sup>8</sup>:

$$j_{enh} \approx j_0 \exp\left(-\lambda/4kT\right) \frac{\exp(e|V_{bias}|/4kT)}{\cosh\left(\frac{e(0.5-\gamma)V_{bias}-e\xi\eta}{2kT}\right)} \quad \text{Equation (1)}$$

Together with:

$$j_0 = en\omega_{eff}/2\pi \quad \text{Equation (2)}$$

and

$$n \approx eV_{bias} \left( \frac{1}{2\kappa_L\rho_L} + \frac{1}{\kappa_R\rho_R} \right)^{-1} \quad \text{Equation (3)}$$

Assuming,  $\kappa=1$  and  $\rho_L = \rho_R$  which is taken as the density of electronic states of gold near the Fermi level, we get:

$$n \approx \frac{2}{3} e V_{bias} \rho$$

And  $j_0 = \frac{e^2 \rho \omega_{eff}}{3\pi} V_{bias}$

Taking  $e^2 \rho \omega_{eff} \approx 1.14 \times 10^{-5} \text{ C}^2/(\text{eV.s})$  from reference <sup>8</sup> we get:

$$j_{enh} \approx 1.21 \times 10^{-6} V_{bias} \exp\left(-\lambda/4kT\right) \frac{\exp(e|V_{bias}|/4kT)}{\cosh\left(\frac{e(0.5-\gamma)V_{bias}-e\xi\eta}{2kT}\right)} \quad \text{Equation (4)}$$

Or in nA:

$$j_{enh} \approx 1210. V_{bias} \exp\left(-\lambda/4kT\right) \frac{\exp(e|V_{bias}|/4kT)}{\cosh\left(\frac{e(0.5-\gamma)V_{bias}-e\xi\eta}{2kT}\right)} \quad \text{Equation (5)}$$

## 6.0 2<sup>2+</sup> Conductance Data

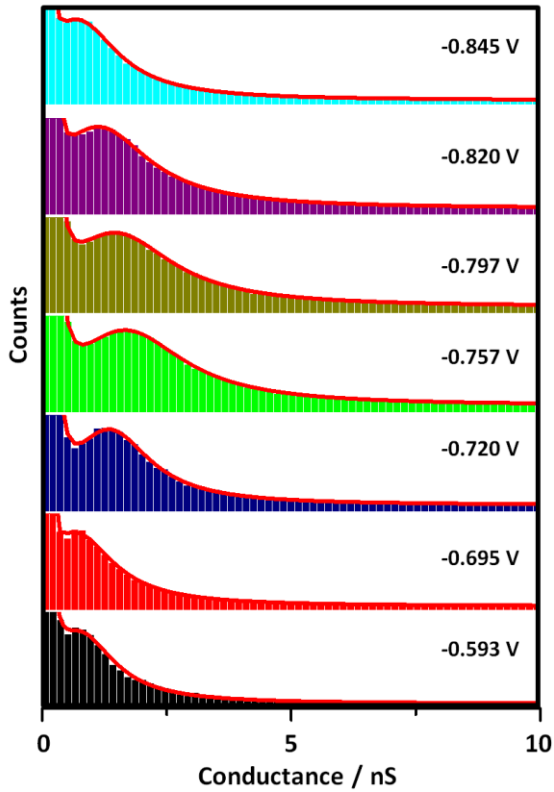

**Figure S3:** Conductance histograms recorded for  $2^{2+}$  molecular bridges in BMIM-OTf electrolyte as a function of the marked electrochemical potential (versus Fc/Fc<sup>+</sup> at 0.0 V).

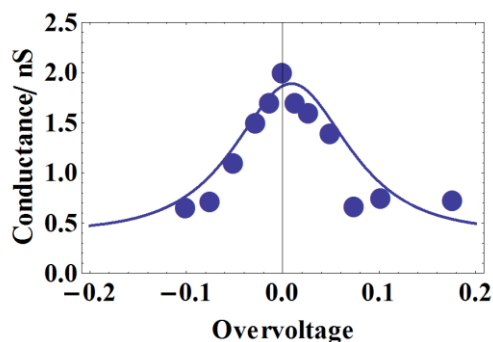

**Figure S4:** Single molecule conductance data (blue circles) and fitting with equation 1 in main text (solid blue lines), for  $2^{2+}$  in BMIM-OTf. The fitting parameters obtained from these data are  $\xi = 1$ ,  $\lambda = 1.3$  eV and  $\gamma = 0.52$ .

## 7.0 Break-off Distance Data

We have recorded junction breaking distance for the  $I(s)$  method as described in the literature and data for  $1^{2+}$  in BMIM-OTf is shown in Figure S5.

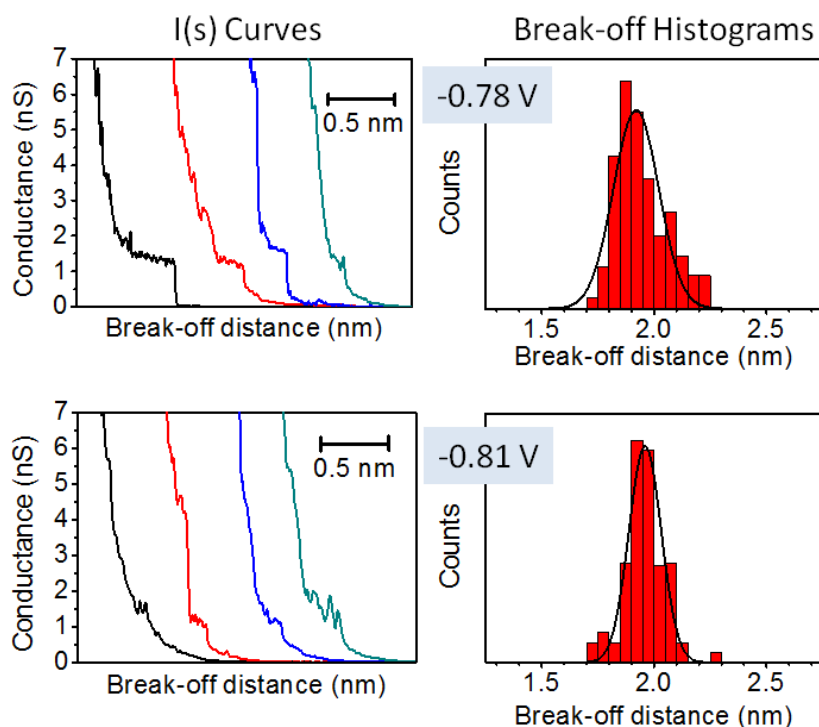

**Figure S5:** Junction breaking distance data for  $1^{2+}$  in BMIM-OTf, recorded using the  $I(s)$  method.

## 8.0 Diffusion Coefficients and Heterogeneous Rate Constants

Diffusion coefficients were calculated using the Randles-Sevcik equation:

$$I_p = 0.4463nF \left( \frac{nF}{RT} \right)^{1/2} AD^{1/2}Cv^{1/2}$$

Where,  $I_p$  is the peak current (A),  $A$  is the area of the electrode ( $\text{cm}^2$ ),  $D$  is the diffusion coefficient ( $\text{cm}^2 \text{s}^{-1}$ ),  $C$  is the concentration of the analyte ( $\text{mol cm}^{-3}$ ) and  $v$  is the scan rate ( $\text{V s}^{-1}$ ).

Heterogeneous rate constants were calculated by application of the Nicolson method,<sup>9</sup> and following the procedure detailed in ref.<sup>10</sup> (Section 3.4). The dimensionless charge transfer parameter ( $\psi$ ) found in the Nicolson method, which is related to  $E_p$ , was calculated using the empirical equation quoted in ref.<sup>10</sup>:

$$\Delta E_p = A + \frac{B}{\psi} + \frac{C}{\psi^{1/2}} + \frac{D}{\psi^{1/3}}$$

Where  $A$ ,  $B$ ,  $C$  and  $D$  have the respective values of 81.34 mV, -3.06 mV, 149 mV and -145.5 mV, at 298 K.

## **9.0 UV-Vis and IR Spectroelectrochemistry**

### **9.1 UV-Vis and IR Spectroelectrochemistry of 2•[2BF<sub>4</sub>] in Ionic Liquids**

A vacuum tight Hamilton syringe was used to fill the air-tight OTTLE cell. The Hamilton syringe was flushed with hot dry BMIM-OTf (to remove possible traces of moisture) and the air-tight OTTLE cell was initially filled with the ionic liquid for background correction. The cell was then filled with the warm solution of 2•[2BF<sub>4</sub>] in BMIM-OTf, using the same dry Hamilton syringe. The viscosity of the BMIM-OTf presents no problem for filling the thin (ca 0.2 mm) space in the composed OTTLE cell, including the areas of the Pt minigrid working and auxiliary electrodes.

The thin-layer cyclic voltammogram was recorded at  $v = 2 \text{ mV s}^{-1}$ . A silver wire pseudo-reference electrode is used in the OTTLE cell and no internal potential standard was added. The thin-layer cyclic voltammogram shows two reversible cathodic waves; however, the corresponding reverse oxidation waves were only partially observed at the expected potentials and complete re-oxidation required potentials to be considerably positively shifted. The reduction and subsequent re-oxidation steps were significantly slower in BMIM-OTf than in DMF/Bu<sub>4</sub>NPF<sub>6</sub> or MeCN/Bu<sub>4</sub>NPF<sub>6</sub> electrolytes and the potential had to be held for several minutes to allow the Faradaic current to drop to zero, resulting in the jagged appearance of the thin-layer cyclic voltammograms.



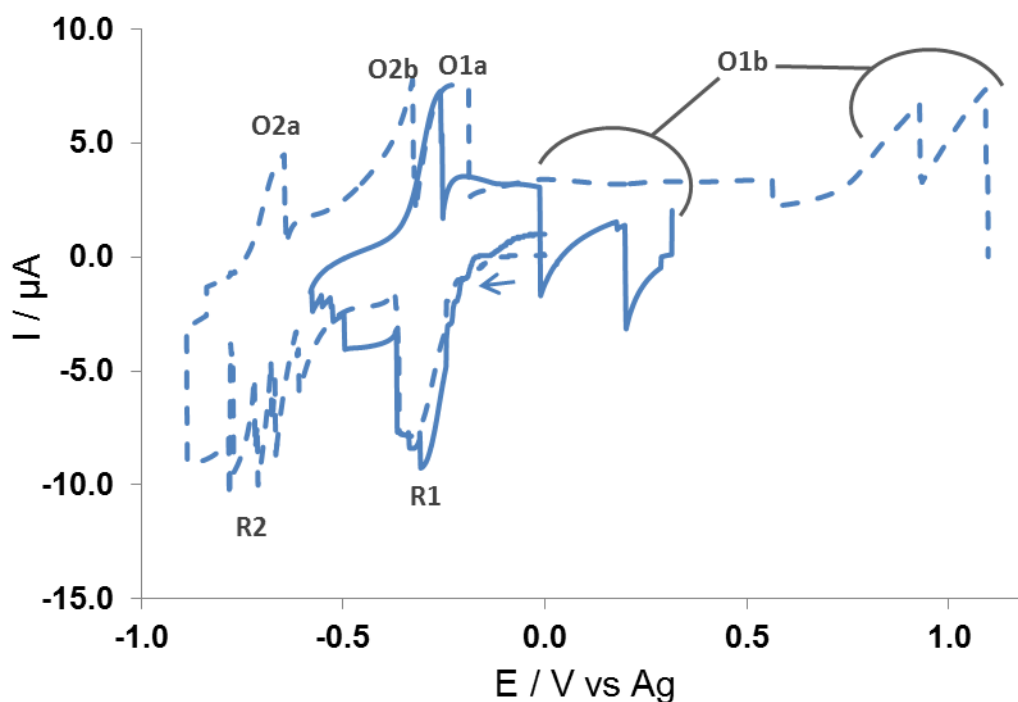

**Figure S6:** Thin-layer cyclic voltammogram monitoring the stepwise IR and UV-Vis spectroelectrochemistry of 10 mM  $\mathbf{2}^{\bullet}[\text{2BF}_4]$  in dry BMIM-OTf in an OTTLE cell at  $T = 293$  K. (solid line = initial reduction to radical cation (R1) and scan reversal (partial reoxidation at O1a with complete reoxidation seen at O1b); dashed line = continued reduction of radical cation to neutral molecule (R2) and scan reversal (partial reoxidation of neutral species to radical cation at O2a with complete reoxidation seen at O2b, partial reoxidation of radical cation to dication at O1a with complete reoxidation seen at O1b)).

The one-electron reduction of  $\mathbf{2}^{\bullet}[\text{2BF}_4]$  resulted in its complete conversion to the corresponding radical cation. Subsequent reduction of the radical cation to the neutral compound could not be taken to completion as the ionic liquid electrolyte also began to undergo reduction at these potentials. UV-Vis spectroelectrochemistry of the one-electron reduction of the radical cation shows the appearance of an intense absorption band at 388 nm while IR monitoring shows the  $\nu(\text{CC})$  band at  $1634\text{ cm}^{-1}$  decrease in intensity accompanied by the growth of a band at  $1660\text{ cm}^{-1}$ . These observations are characteristic for the neutral form of the viologen<sup>11,12</sup> and indicate that the ionic liquid electrolyte does not significantly affect the viologen vibrational behavior. Reoxidation of the neutral viologen led to regeneration of the radical cation then the dication, showing that the system has good reversibility in the ionic liquid.

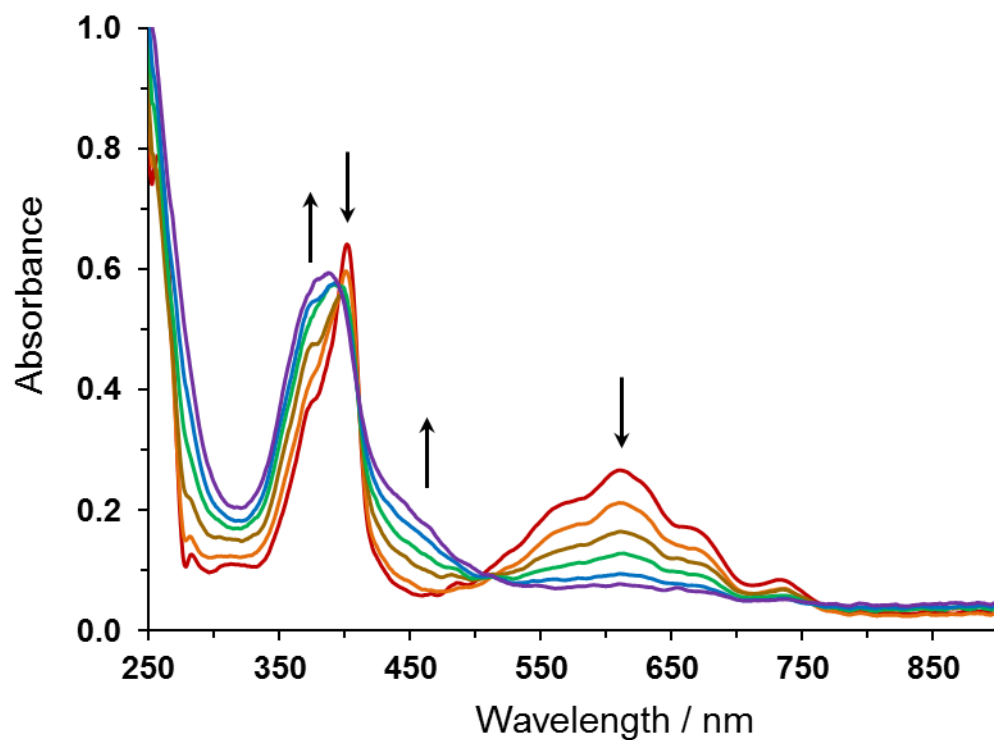

**Figure S7:** Reversible UV-Vis spectral changes of 2 mM  $2\bullet[2BF_4]$  in dry BMIM-OTf accompanying the reduction of its stable radical cation to the neutral molecule within an optically transparent thin layer electrochemical (OTTLE) cell at  $T = 293$  K.

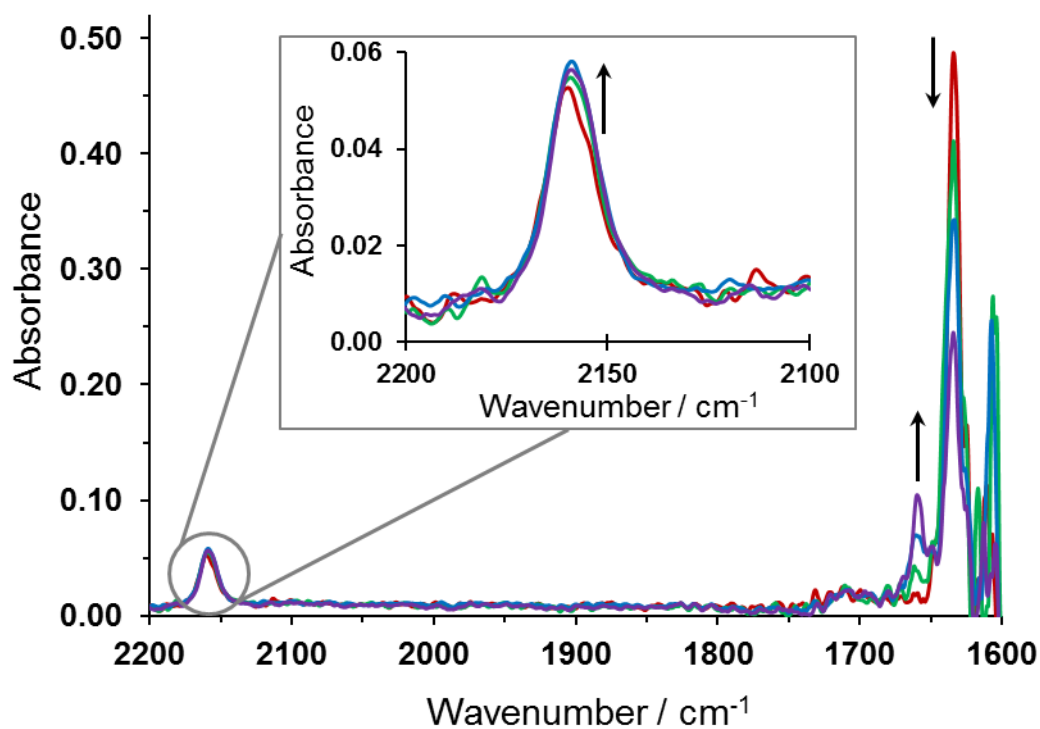

**Figure S8:** Reversible IR spectral changes accompanying the reduction of 10 mM **2**•[2BF<sub>4</sub>] in dry BMIM-OTf from its stable radical cation to the neutral molecule within an optically transparent thin layer electrochemical (OTTLE) cell at  $T = 293$  K.

## 9.2 UV-Vis and IR Spectroelectrochemistry of **2**•[2BF<sub>4</sub>] in DMF and Acetonitrile

Acetonitrile was distilled from P<sub>2</sub>O<sub>5</sub> under N<sub>2</sub>. DMF was purchased dry and bubbled with argon before use. Bu<sub>4</sub>NPF<sub>6</sub> electrolyte was recrystallized twice from hot ethanol. Solutions contained 0.3 M Bu<sub>4</sub>NPF<sub>6</sub> and 2 mM (UV-Vis spectroelectrochemistry) or 4 mM (IR spectroelectrochemistry) **2**•[2BF<sub>4</sub>]. Thin-layer cyclic voltammograms were recorded at  $\nu = 2$  mV s<sup>-1</sup> and show two reversible cathodic waves. Unlike in BMIM-OTf, there was no significant positive shift of the anodic counter waves.

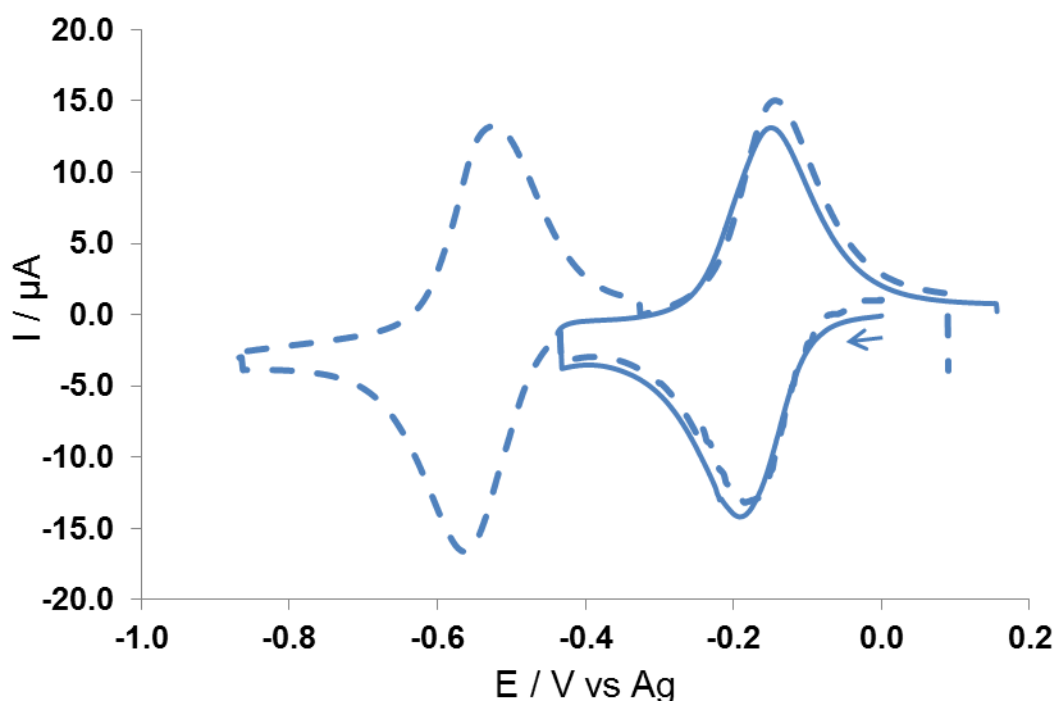

**Figure S9:** Thin-layer cyclic voltammogram monitoring the stepwise IR and UV-Vis spectroelectrochemistry of 2 mM **2**•[2BF<sub>4</sub>] in dry DMF/Bu<sub>4</sub>NPF<sub>6</sub> in an OTTLE cell at  $T = 293$  K (solid line = initial reduction to radical cation and scan reversal; dashed line = continued reduction of radical cation to neutral molecule and scan reversal).

UV-Vis spectroelectrochemistry of the initial one-electron reduction of **2**•[2BF<sub>4</sub>] to its radical cation in MeCN results in the appearance of intense absorption bands around 400 nm and 610 nm. IR monitoring shows formation of an intense  $\nu(\text{C}=\text{C})$  band at 1635 cm<sup>-1</sup> and an increase in absorbance from the  $\nu(\text{C}\equiv\text{C})$  band at 2160 cm<sup>-1</sup>. The radical cation could be reversibly reduced to the neutral form of the viologen with an intense band observed at 388

nm in the UV-Vis spectrum, and IR spectroelectrochemistry showing the formation of a band at  $1660\text{ cm}^{-1}$ .

UV-Vis and IR spectroelectrochemistry of  $2\cdot[2\text{BF}_4]$  recorded in MeCN/ $\text{Bu}_4\text{NPF}_6$  was very similar to that obtained in BMIM-OTf. This supports the conclusion that the electronic structure of the reduced species do not differ significantly with the use of an ionic liquid electrolyte.

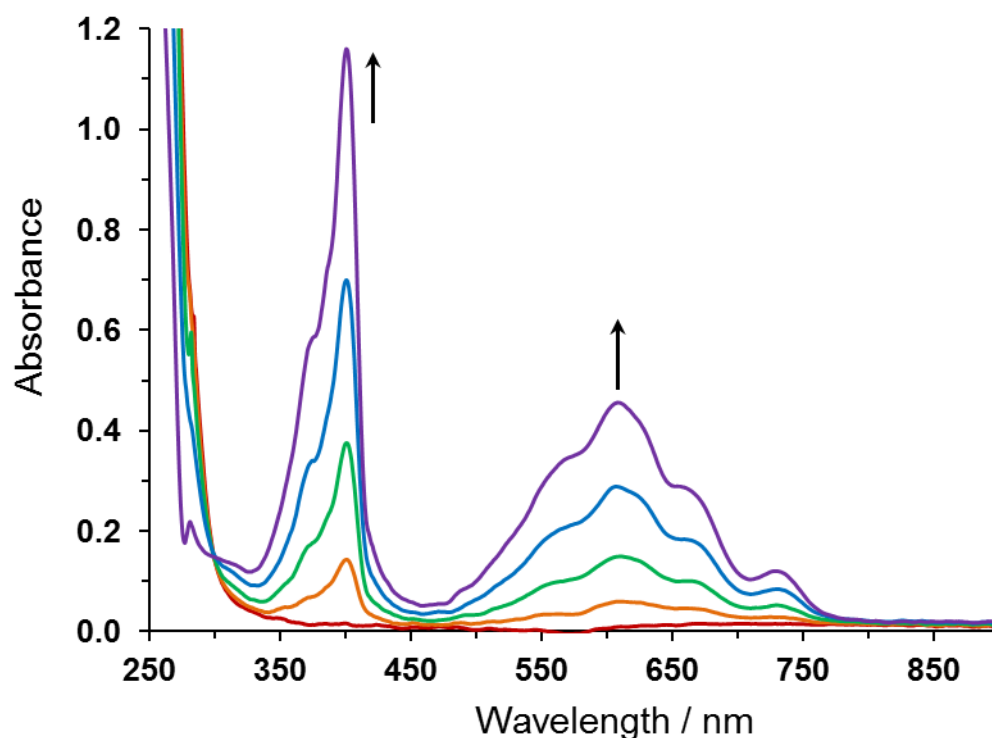

**Figure S10:** Reversible UV-Vis spectral changes accompanying the reduction of 2 mM  $2\cdot[2\text{BF}_4]$  in dry MeCN/ $\text{Bu}_4\text{NPF}_6$  to its stable radical cation within an OTTLE cell at  $T = 293\text{ K}$ .

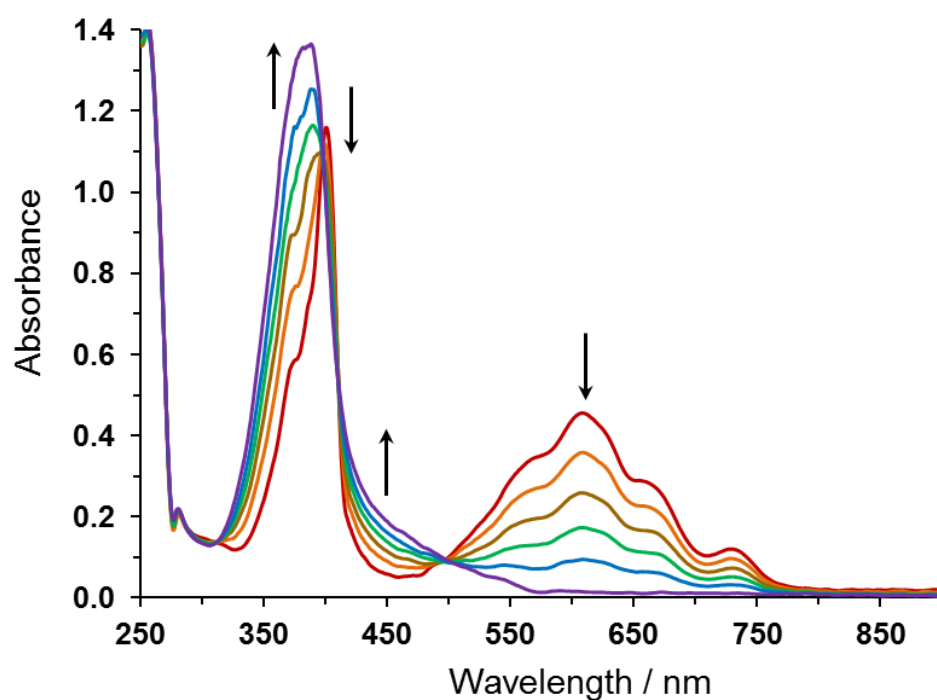

**Figure S11:** Reversible UV-Vis spectral changes of 2 mM  $2\bullet[2BF_4]$  in dry MeCN/ $Bu_4NPF_6$  accompanying the reduction of its stable radical cation to the neutral molecule within an OTTLE cell at  $T = 293$  K.

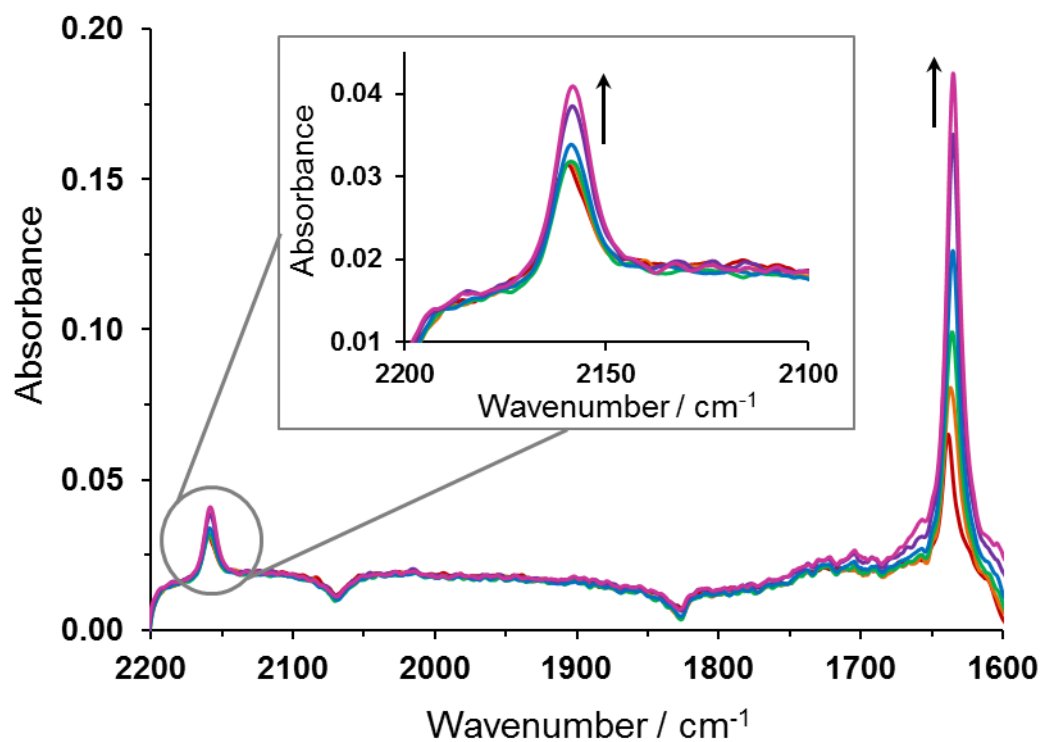

**Figure S12:** Reversible IR spectral changes accompanying the reduction of 4 mM  $2\bullet[2BF_4]$  in dry MeCN/ $Bu_4NPF_6$  to its stable radical cation within an OTTLE cell at  $T = 293$  K.

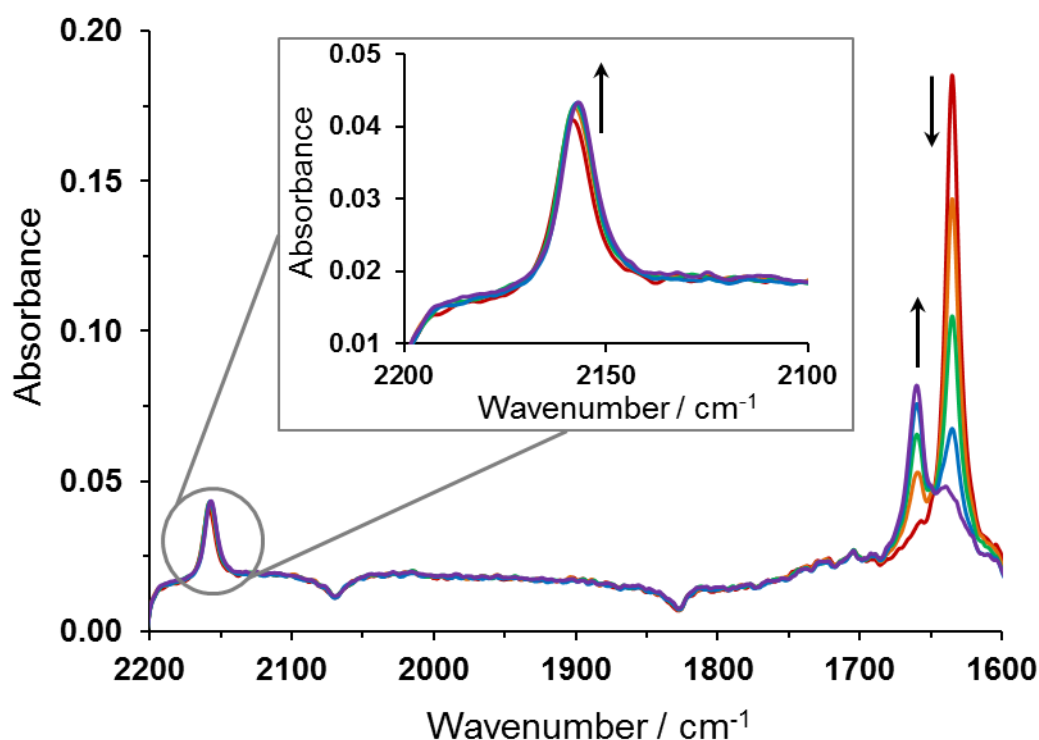

**Figure S13:** Reversible IR spectral changes of 4 mM  $2\bullet[2BF_4]$  in dry MeCN/ $Bu_4NPF_6$  accompanying the reduction of its stable radical cation to the neutral molecule within an OTTLE cell at  $T = 293$  K.

### 9.3 UV-Vis and IR Spectroelectrochemistry of $11\bullet[2Cl]$ and $12\bullet[2Cl]$ in Ionic Liquids

Spectroelectrochemistry of methyl-viologen dichloride ( $11\bullet[2Cl]$ ) and benzyl-viologen dichloride ( $12\bullet[2Cl]$ ) (Sigma Aldrich) was recorded in BMIM-OTf using the same procedure as for  $2\bullet[2BF_4]$ . The thin-layer cyclic voltammograms are not shown, but were similar to those recorded for  $2\bullet[2BF_4]$  with slow electrochemical steps and partially positively shifted reoxidation waves. The UV-Vis and IR spectra of the dication  $2^{2+}$ ,  $11^{2+}$  and  $12^{2+}$  and the corresponding radical cations ( $2^+$ ,  $11^+$  and  $12^+$ ) and neutral species (**2**, **11** and **12**) are also comparable.

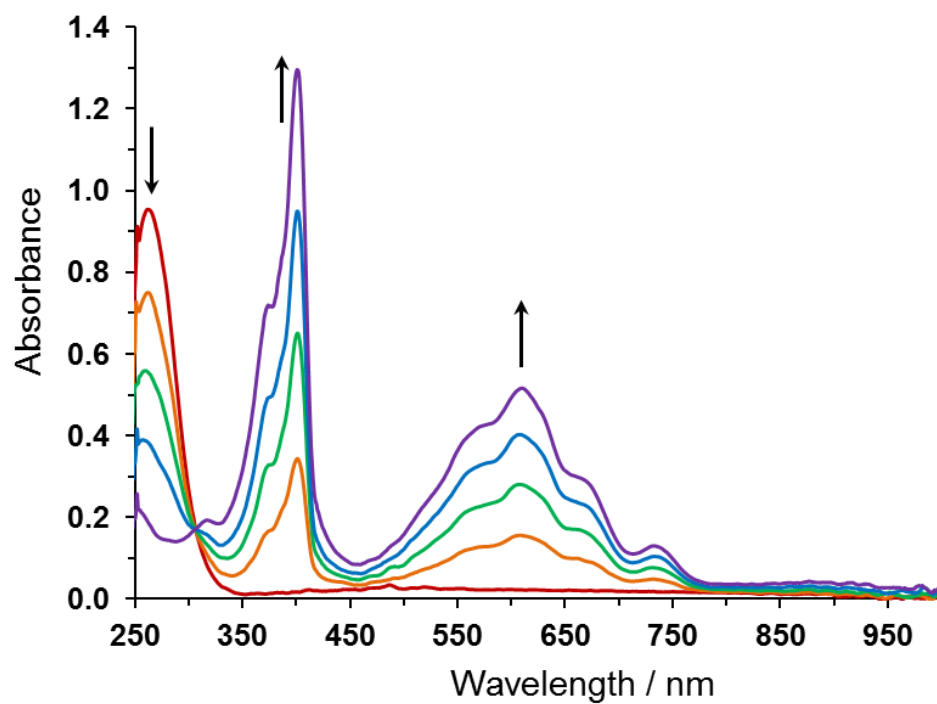

**Figure S14:** Reversible UV-Vis spectral changes accompanying the reduction of 2 mM  $12\bullet[2Cl]$  in BMIM-OTf to its stable radical cation ( $12^+$ ) within an OTTLE cell at  $T = 293$  K.

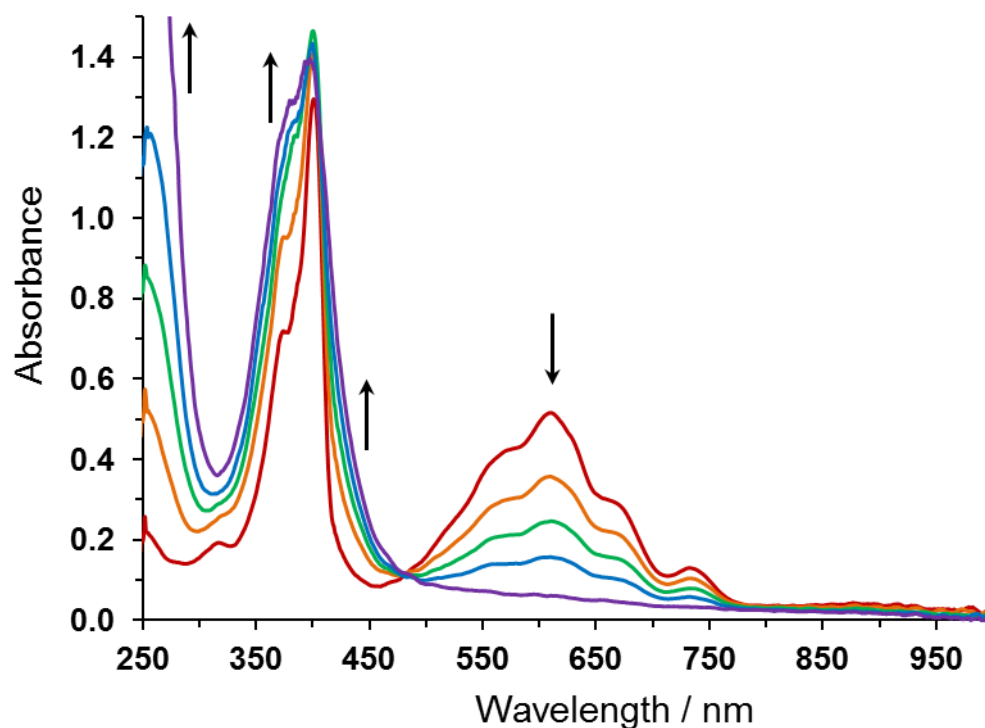

**Figure S15:** Reversible UV-Vis spectral changes of 2 mM  $12\bullet[2Cl]$  in BMIM-OTf accompanying the reduction of its stable radical cation ( $12^+$ ) to the neutral molecule ( $12$ ) within an OTTLE cell at  $T = 293$  K.

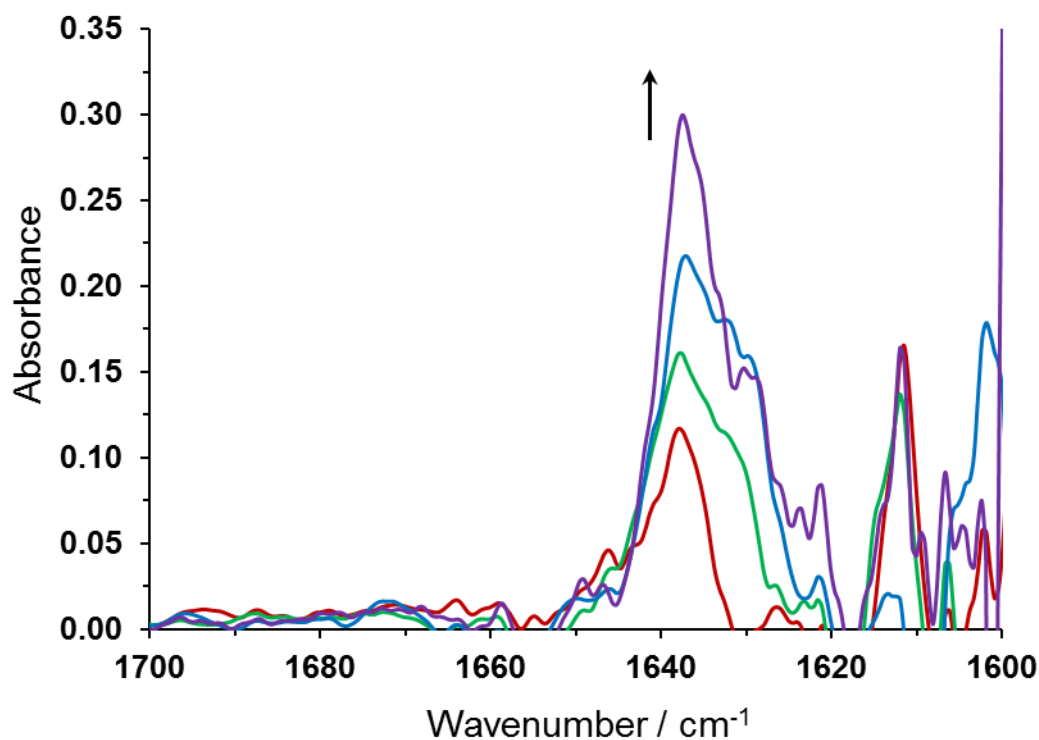

**Figure S16:** Reversible IR spectral changes accompanying the reduction of 10 mM **12**•[2Cl] in BMIM-OTf to its stable radical cation (**12**<sup>+</sup>) within an OTTLE cell at  $T = 293$  K.

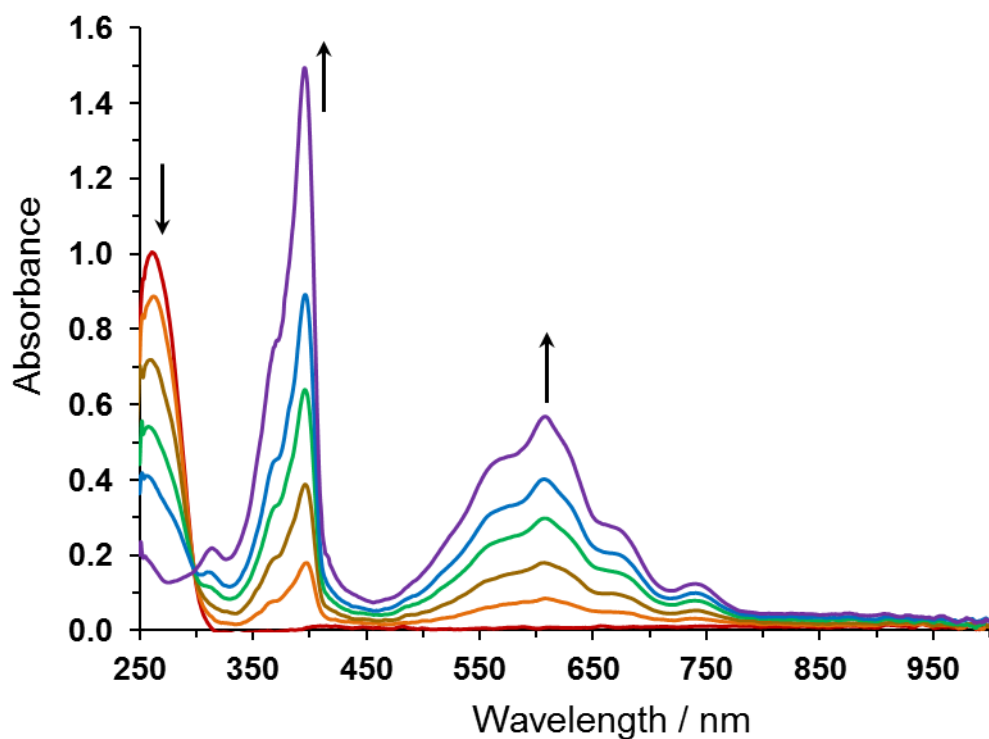

**Figure S17:** Reversible UV-Vis spectral changes accompanying the reduction of 2 mM **11**•[2Cl] in BMIM-OTf to its stable radical cation (**11**<sup>+</sup>) within an OTTLE cell at  $T = 293$  K.



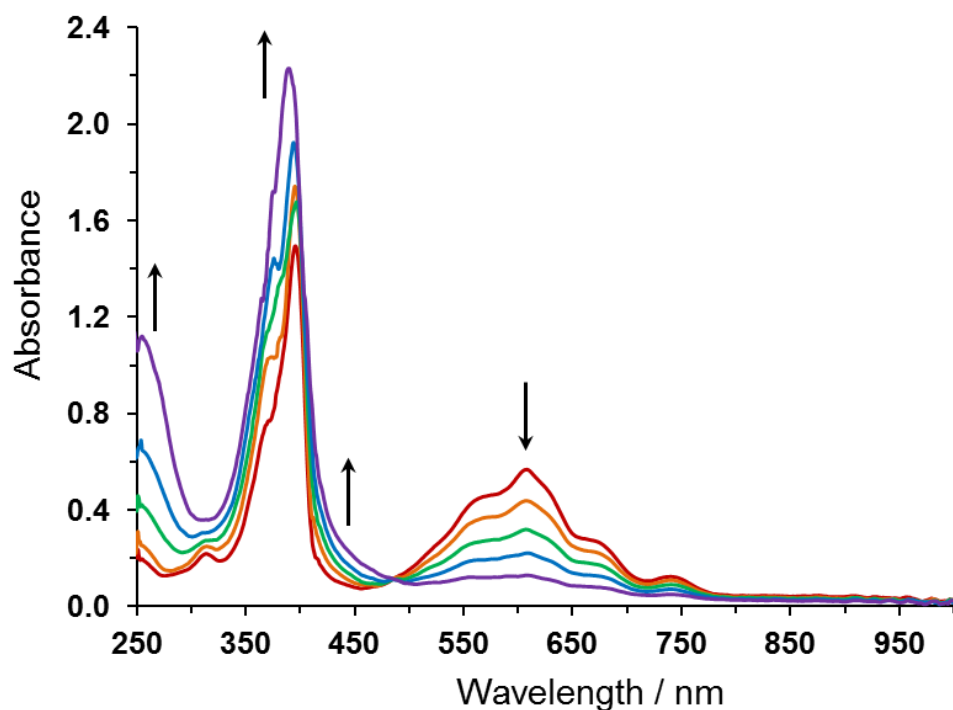

**Figure S18:** Reversible UV-Vis spectral changes of 2 mM **11**•[2Cl] in BMIM-OTf accompanying the reduction of its stable radical cation (**11**<sup>+</sup>) to the neutral molecule (**11**) within an OTTLE cell at  $T = 293$  K.

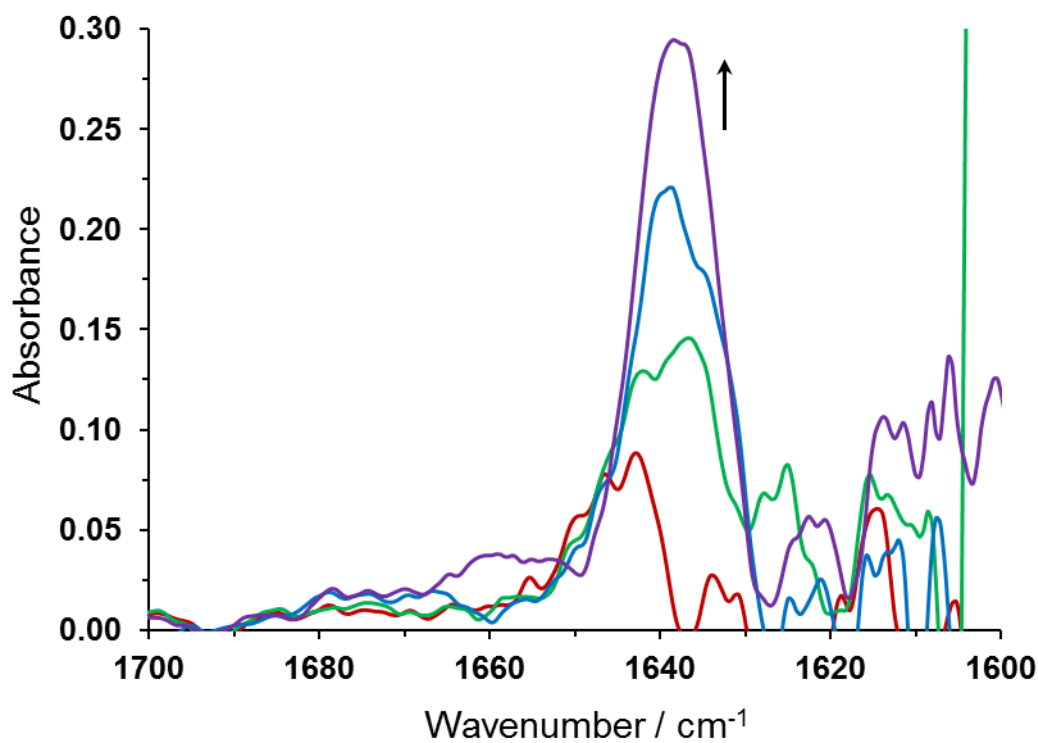

**Figure S19:** Reversible IR spectral changes accompanying the reduction of 10 mM **11**•[2Cl] in BMIM-OTf to its stable radical cation (**11**<sup>+</sup>) within an OTTLE cell at  $T = 293$  K.

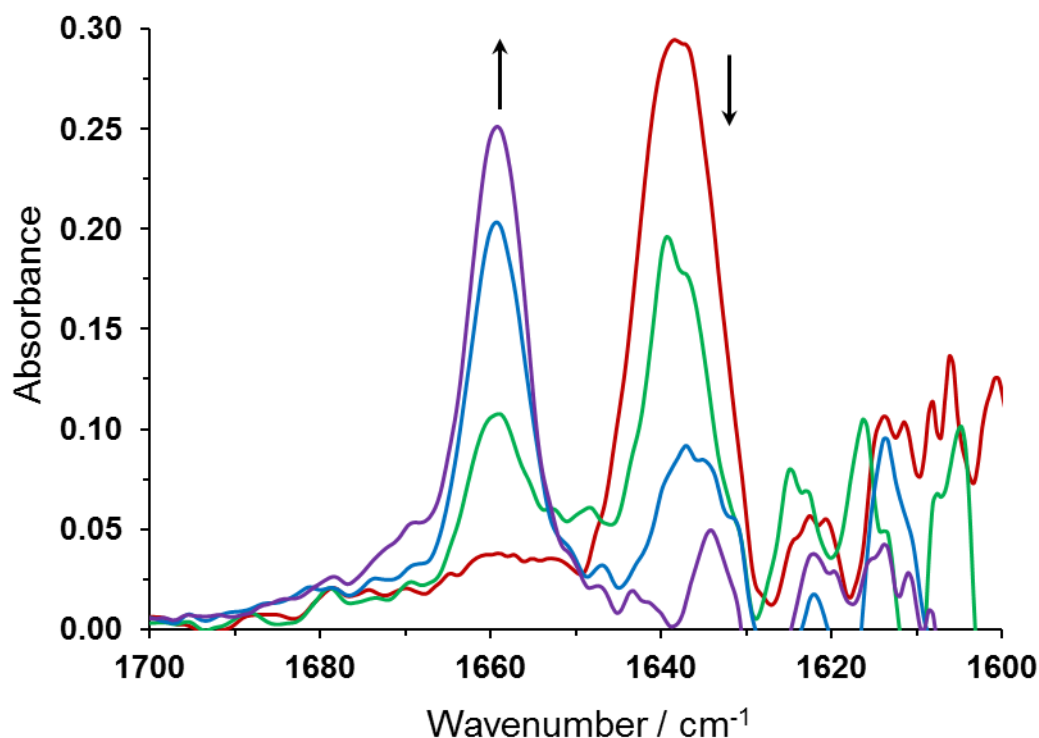

**Figure S20:** Reversible UV-Vis spectral changes of 10 mM **11**•[2Cl] in BMIM-OTf accompanying the reduction of its stable radical cation (**11**<sup>+</sup>) to the neutral molecule (**11**) within an OTTLE cell at  $T = 293$  K.

#### 9.4 UV-Vis and IR Spectroelectrochemistry of **11**•[2Cl] in D<sub>2</sub>O

D<sub>2</sub>O was bubbled with argon before use. Solutions contained 0.3 M Bu<sub>4</sub>Br and 2 mM (UV-Vis spectroelectrochemistry) or 10 mM (IR spectroelectrochemistry) **11**•[2Cl]. The reduction of **11**•[2Cl] to its corresponding radical cation could be followed in D<sub>2</sub>O with UV-Vis and IR spectroelectrochemistry. The spectra of the reduced species show some differences from those recorded in ionic liquid which can be explained by the expected dimerization of the radical cation in aqueous solutions.<sup>13,14</sup>

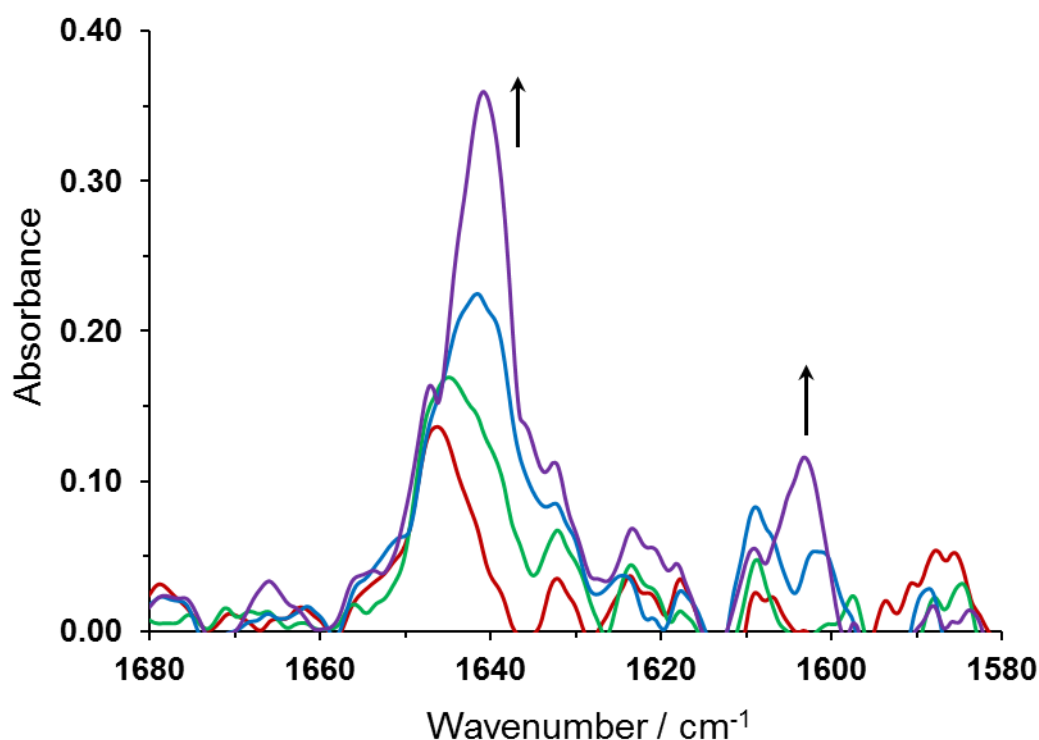

**Figure S21:** Reversible IR spectral changes accompanying the reduction of 10 mM **11**•[2Cl] in D<sub>2</sub>O/Bu<sub>4</sub>NBr to a radical cation (**11**<sup>+</sup>) and its subsequent dimerization within an OTTE cell at *T* = 293 K.

### 10.0 Error Analysis for **1**<sup>2+</sup> and **2**<sup>2+</sup> Conductance Data

Figure S21 and S22 show molecular conductance data for **1**<sup>2+</sup> and **2**<sup>2+</sup>, respectively, in BMIM-OTf with errors. These errors are used to estimate fitting errors in the parameters  $\xi$ ,  $\lambda$  and  $\gamma$  as quoted in the main manuscript. Errors for the conductance data for **1**<sup>2+</sup> in aqueous electrolyte are taken from reference <sup>15</sup> and used to compute fitting errors for this aqueous data.

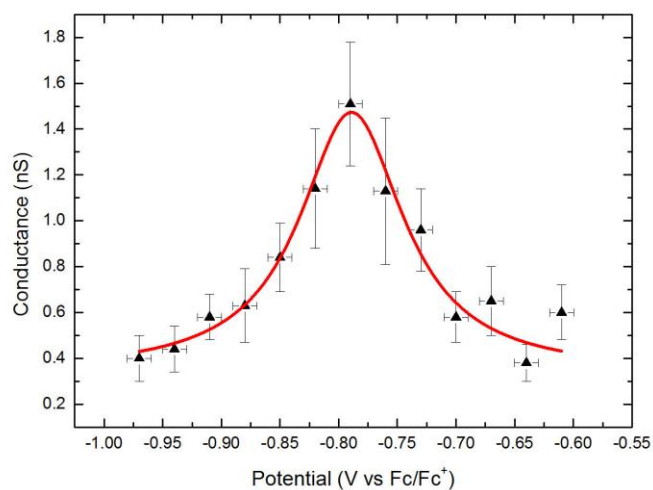

**Figure S21:** The single-molecule conductance of  $1^{2+}$  versus electrochemical potential.

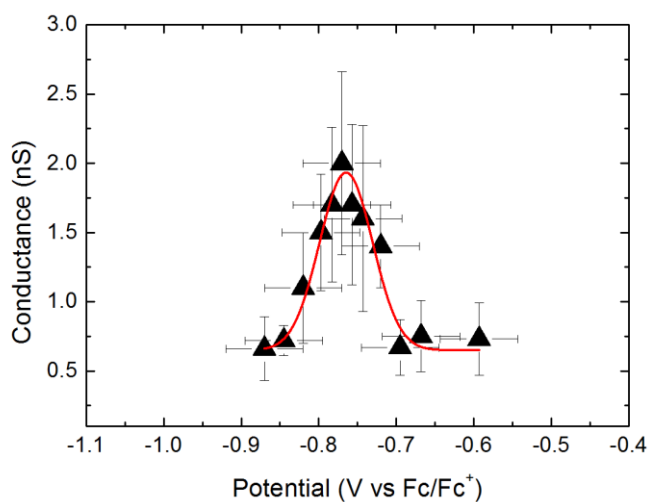

**Figure S22:** The single-molecule conductance of  $2^{2+}$  versus electrochemical potential.

### **11.0 Bias Voltage Data**

Figure S22 shows conductance versus bias voltage for  $1^{2+}$  recorded under ambient conditions. The  $G$  vs  $V$  plot is relatively flat in the region between -1 and 1 V.

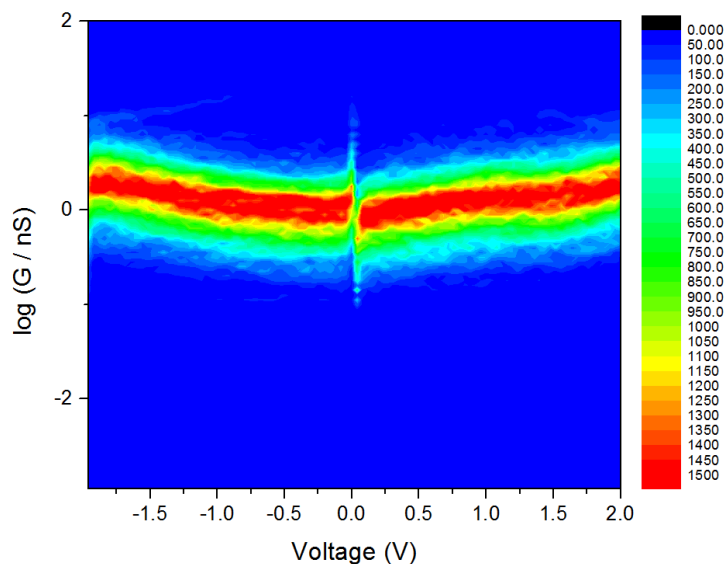

**Figure S22:** Conductance versus bias voltage for  $1^{2+}$  recorded under ambient conditions. The plot has been obtained using 1000 IV curves, with an automated data selection that filtered out data that did not fit to a polynomial curve.

## **References**

- (1) Miyaura, N.; Suzuki, A. *Organic Syntheses* **1990**, 68, 130.
- (2) Fulmer, G. R.; Miller, A. J. M.; Sherden, N. H.; Gottlieb, H. E.; Nudelman, A.; Stoltz, B. M.; Bercaw, J. E.; Goldberg, K. I. *Organometallics* **2010**, 29, 2176.
- (3) Gittins, D. I.; Bethell, D.; Nichols, R. J.; Schiffrin, D. J. *Adv. Mater.* **1999**, 11, 737.
- (4) Haiss, W.; Nichols, R. J.; Higgins, S. J.; Bethell, D.; Hobenreich, H.; Schiffrin, D. J. *Faraday Discuss.* **2004**, 125, 179.
- (5) Shi, L.; Jing, C.; Ma, W.; Li, D.-W.; Halls, J. E.; Marken, F.; Long, Y.-T. *Angew. Chem. Int. Ed.* **2013**, 52, 6011.
- (6) Fourmond, V.; Hoke, K.; Heering, H. A.; Baffert, C.; Leroux, F.; Bertrand, P.; Leger, C. *Bioelectrochemistry* **2009**, 76, 141.
- (7) MATLAB version 8.0.0, T. M. I., Natick, Massachusetts (USA), 2012.
- (8) Zhang, J. D.; Kuznetsov, A. M.; Medvedev, I. G.; Chi, Q. J.; Albrecht, T.; Jensen, P. S.; Ulstrup, J. *Chem. Rev.* **2008**, 108, 2737.
- (9) Nicholson, R. *Anal. Chem.* **1965**, 37, 1351.
- (10) Siraj, N.; Grampp, G.; Landgraf, S.; Punyain, K. *Zeitschrift Fur Physikalische Chemie-International Journal of Research in Physical Chemistry & Chemical Physics* **2013**, 227, 105.
- (11) Porter, W. W.; Vaid, T. P. *J. Org. Chem.* **2005**, 70, 5028.
- (12) Bockman, T. M.; Kochi, J. K. *J. Org. Chem.* **1990**, 55, 4127.
- (13) Brienne, S. H. R.; Cooney, R. P.; Bowmaker, G. A. *Journal of the Chemical Society-Faraday Transactions* **1991**, 87, 1355.
- (14) Kim, H. J.; Jeon, W. S.; Ko, Y. H.; Kim, K. *Proc. Nat. Acad. Sci. U.S.A.* **2002**, 99, 5007.
- (15) Haiss, W.; van Zalinge, H.; Higgins, S. J.; Bethell, D.; Hobenreich, H.; Schiffrin, D. J.; Nichols, R. *J. J. Am. Chem. Soc.* **2003**, 125, 15294.
